# Supplementary material
Source: publisher figshare collection journal article supplement (https://gsajournals.figshare.com/ndownloader/files/27953676)
Supplement: Supplementary file 1 [file 27953676]

Supplementary Table 2. Oligonucleotides used in this study

| **primer** | **Sequence** | **Description** |
| --- | --- | --- |
| C.a. LEU2 upstr for | GTGCTGCAAGGCGATTAAGTTGGG | NruI insertion into pSN105 |
| C.d. ARG4 upstr rev | TTATCTTAACCTTCTAGTCCACGT |
| NRU for | CACTCCAGAAATACTCCCCTTTTCTCGCGAACATTTCTGTACCGC |
| NRU rev | GATACATTTGCGGTACAGAAATGTTCGCGAGAAAAGGGGAGTATT |
| Check LEU2 up437_for | GCATCTTTGGAACCATCATA |
| CUP9_for | GTTGTGATTTTGCTATTCCGGCGCTCCTTCTGGGGTGCCCCGGAAGGAATTATCGAGCCA | Forward primer at -3022 bp site of *CUP9* ORF for complementation |
| CUP9_rev | TAACACACCATCGAAAAAGTCGATACATTTGCGGTACAGAGGGCTTTGGTTTTGGTAATTTC | Reverse primer at +1578 bp site of *CUP9* ORF for complementation |
| sgRNA/F_orf19.3499 | AAGAGCGACGATAGCAATTGGTTTTAGAGCTAGAAATAGCAAGTTAAA | Forward primer for amplification of sgRNA scaffold with overlapping *ORF19.3499* guide sequence |
| SNR52/R_ orf19.3499 | CAATTGCTATCGTCGCTCTTCAAATTAAAAATAGTTTACGCAAGTC | Reverse primer for amplification of *SNR52* promoter with overlapping *ORF19.3499* guide sequence |
| orf19.3499_CRISPR for | AGGAGACCCATATTTCCAATCAATTCGAATCAAATTTCCCATCTCCATCAATCAATCAACTAACAAACAAACAAATCAATTTTCCCAGTCACGACGTT | Forward primer for amplification of *ORF19.3499* deletion cassette |
| orf19.3499_CRISPR rev | AGGGAAAGAAATATAAGGCAACGACGATAGAAGTGAAGTGTTTAAAACAAACACAGACTGGTAGATAATAAACAAATCATGTGGAATTGTGAGCGGATA | Reverse primer for amplification of *ORF19.3499* deletion cassette |
| New orf19.3499_CRISPR for | AGGAGACCCATATTTCCAATCAATTCGAATCAAATTTCCCATCTCCATCAATCAATCAACTAACAAACAAACAAATCAATGCCAGTGTGATGGATATCTGCAG | Forward primer for amplification of *ORF19.3499* deletion cassette used in the triple mutant construction |
| New orf19.3499_CRISPR rev | AGGGAAAGAAATATAAGGCAACGACGATAGAAGTGAAGTGTTTAAAACAAACACAGACTGGTAGATAATAAACAAATCATCCGCCAGTGTGCTGGAAT | Reverse primer for amplification of *ORF19.3499* deletion cassette used in the triple mutant construction |
| ORF19.3499_ for | CCTTTCCCTAATGATCAACTCTTGA | Forward primer at -118 bp site of *ORF19.3499* ORF |
| ORF19.3499_rev | TAAGTGAATTTAGTAGCTGGTTCAGCAATA | Reverse primer at +200 bp site of *ORF19.3499 ORF* |
| ARG4_rev | TTATCTTAACCTTCTAGTCCACGT | Reverse primer to detect *CdARG4* expression cassette |
| sgRNA/F_orf19.851 | TTCATTATTAGAAGATCTCGGTTTTAGAGCTAGAAATAGCAAGTTAAA | Forward primer for amplification of sgRNA scaffold with overlapping *ORF19.851* guide sequence |
| SNR52/R_ orf19.851 | CGAGATCTTCTAATAATGAACAAATTAAAAATAGTTTACGCAAGTC | Reverse primer for amplification of *SNR52* promoter with overlapping *ORF19.851* guide sequence |
| orf19.851_CRISPR for | TGGCATTTTTTTTTATCATATCTAGCATTTCATCTTCTTCATTGGTTACAATACCTATCTCACATCATATACACTAGAACTTTCCCAGTCACGACGTT | Forward primer for amplification of *ORF19.851* deletion cassette |
| orf19.851_CRISPR rev | CCCTATAACTGATCTATTGATTTGATAGACGAATAAATATGCAATACATACATCTGTCAGTTGTGCTTATTGTTTTTCATGTGGAATTGTGAGCGGATA | Reverse primer for amplification of *ORF19.851* deletion cassette |
| New orf19.851_CRISPR for | TGGCATTTTTTTTTATCATATCTAGCATTTCATCTTCTTCATTGGTTACAATACCTATCTCACATCATATACACTAGAACGCCAGTGTGATGGATATCTGCAG | Forward primer for amplification of *ORF19.851* deletion cassette used in the triple mutant construction |
| New orf19.851_CRISPR rev | CCCTATAACTGATCTATTGATTTGATAGACGAATAAATATGCAATACATACATCTGTCAGTTGTGCTTATTGTTTTTCATCCGCCAGTGTGCTGGAAT | Reverse primer for amplification of *ORF19.851* deletion cassette used in the triple mutant construction |
| orf19.851 for | TCCACAGATATTGATTCATACAGAT | Forward primer at -165 bp site of *ORF19.851*ORF |
| orf19.851 rev | TAATTTATTAGTAGTTGTTTGATATTGTCG | Reverse primer at +155 bp site of *ORF19.851 ORF* |
| sgRNA/F_PGA28 | CACTTCGCAGCCATTGGCAGGTTTTAGAGCTAGAAATAGCAAGTTAAA | Forward primer for amplification of sgRNA scaffold with overlapping *PGA28* guide sequence |
| SNR52/R_PGA28 | CTGCCAATGGCTGCGAAGTGCAAATTAAAAATAGTTTACGCAAGTC | Reverse primer for amplification of *SNR52* promoter with overlapping *PGA28* guide sequence |
| PGA28_CRISPR for | GTTGCATCCTCCAATAAAACACGGTCAAGTTTTTGTTTTAATTCAATTAGAAAGCTATTCACAACCCTCAATTCTCCATATTTCCCAGTCACGACGTT | Forward primer for amplification of *PGA28* deletion cassette |
| PGA28_CRISPR rev | ACACATAAACTACTAAAGGTACAGTCTCCTATAATTGTCGGCTTTAATCATCAAGTAAATCACACTATAAATAGGAGCATGTGGAATTGTGAGCGGATA | Reverse primer for amplification of *PGA28* deletion cassette |
| New PGA28_CRISPR for | GTTGCATCCTCCAATAAAACACGGTCAAGTTTTTGTTTTAATTCAATTAGAAAGCTATTCACAACCCTCAATTCTCCATAGCCAGTGTGATGGATATCTGCAG | Forward primer for amplification of *PGA28* deletion cassette used in the triple mutant construction |
| New PGA28_CRISPR rev | ACACATAAACTACTAAAGGTACAGTCTCCTATAATTGTCGGCTTTAATCATCAAGTAAATCACACTATAAATAGGAGCATCCGCCAGTGTGCTGGAAT | Reverse primer for amplification of *PGA28* deletion cassette used in the triple mutant construction |
| PGA28 for | TTTAGAGTAACCAGTAATGAATTTGAAAAT | Forward primer at -149 bp site of *PGA28* ORF |
| PGA28 rev | ATCGAAAGCGCCATTACAACTG | Reverse primer at +150 bp site of *ORF19.851 ORF* |
| SNR52/R_EFG1-1 | GTTGATTGGCTGCAGTTGTTCAAATTAAAAATAGTTTACGCAAGTC | Reverse primer for amplification of *SNR52* promoter with overlapping *EFG1* guide sequence |
| sgRNA/F_EFG1-1 | AACAACTGCAGCCAATCAACGTTTTAGAGCTAGAAATAGCAAGTTAAA | Forward primer for amplification of sgRNA scaffold with overlapping *EFG1* guide sequence |
| EFG1_NAT_F | CCAACCAACCCTTAACCCATTAACGAATTAAGATTTGTTCTATTTGACTACCAAGAATATAACCCATATTATTTCCCAGTCACGACGTT | Forward primer for amplification of *EFG1* deletion cassette |
| EFG1_NAT_R | GTTAATGAAATATATGCTATAATCTAATTTGGAATTTATGGCAGAAAGCAGAAGGTGATGTACACAAATGATGTGGAATTGTGAGCGGATA | Reverse primer for amplification of *EFG1* deletion cassette |
| SNR52/R_NAT-2 | CTATGTTCTGGAGCAACTTCCAAATTAAAAATAGTTTACGCAAGTC | Reverse primer for amplification of *SNR52* promoter with overlapping *NAT* guide sequence |
| sgRNA/F_NAT-2 | GAAGTTGCTCCAGAACATAGGTTTTAGAGCTAGAAATAGCAAGTTAAA | Forward primer for amplification of sgRNA scaffold with overlapping *NAT* guide sequence |
| EFG1_F compl | CCAACCAACCCTTAACCCATTAACGAATTAAGATTTGTTCTATTTGACTACCAAGAATATAACCCATATTA | Forward primer for amplification of *EFG1* complementation cassette |
| EFG1_R compl | GTTAATGAAATATATGCTATAATCTAATTTGGAATTTATGGCAGAAAGCAGAAGGTGATGTACACAAATGAT | Reverse primer for amplification of *EFG1* complementation cassette |
| CaCas9_F | ATCTCATTAGATTTGGAACTTGTGGGTT | Forward primer for amplification of *CaCas9* cassette |
| CaCas9_R | TTCGAGCGTCCCAAAACCTTCT | Reverse primer for amplification of *CaCas9* cassette |
| SNR52_F | AAGAAAGAAAGAAAACCAGGAGTGAA | Forward primer for amplification of *SNR52* promoter |
| sgRNA_R | ACAAATATTTAAACTCGGGACCTGG | Reverse primer for amplification of sgRNA scaffold |
| SNR52/N | GCGGCCGCAAGTGATTAGACT | Forward nested primer for construction of sgRNA expression cassette |
| sgRNA/N | GCAGCTCAGTGATTAAGAGTAAAGATGG | Reverse nested primer for construction of sgRNA expression cassette |
| EFG1 154 up_F | GCCTCCCACATTAGTTGCTC | Forward primer at -154 bp of *EFG1* ORF |
| EFG1 119 down_R | ATGGCAGAAAGCAGAAGGTG | Reverse primer at +119 bp downstream of *EFG1* ORF |
| EFG1 orf 154_R | TTGGTTGTTGCATTGTCGAT | Reverse primer at +154 bp of *EFG1* ORF |
| NAT_R | TCAATGGTGGATCAACTGGAACTTC | Reverse primer to detect *NAT* expression cassette |
| C.a. ARG4 compl_F | TTGACAAGGCAAAAAAAAAAAAATTTTATCTTTGAAAAATTTTTCTTCCTTTTCTTCTTCTGTTCTTTACATAACAGCTATCAAGAATAATCAATTAATA | Forward primer for amplification of *ARG4* complementation cassette |
| C.a. ARG4 compl_R | ATTATAACACTAGTATTGGAGTACAAGGTATCTCTGTGTTAATTGATTATATTTTATGTAAGTTAAACAATACTGTGATTATTATATGACTATTTATAAA | Reverse primer for amplification of *ARG4* complementation cassette |
| C.a. ARG4 check_F | CTCAAATAAACCAGAATGAAGGATTGAAGG | Forward primer at -427 bp of *ARG4* ORF |
| C.a. ARG4 check_R | AAGAGGTAGTCTCCGATTATGATTCAGACG | Reverse primer at +363 bp downstream of *ARG4* ORF |
| SNR52/R_arg4::dpl200 | AGCAGCGGGATTATTCTTGACAAATTAAAAATAGTTTACGCAAGTC | Reverse primer for amplification of *SNR52* promoter with overlapping *arg4::dpl200* guide sequence |
| sgRNA/F_arg4::dpl200 | TCAAGAATAATCCCGCTGCTGTTTTAGAGCTAGAAATAGCAAGTTAAA | Forward primer for amplification of sgRNA scaffold with overlapping *arg4::dpl200* guide sequence |
